# Supplementary material for: Detection of gaseous amines with a fluorescent film based on a perylene bisimide-functionalized copolymer
Source: Royal Society of Chemistry journal article supplement (doi:10.1039/c8nj02540a), 2018-01-01
Supplement: c8nj02540a1.pdf [file c8nj02540a1.pdf]

## Supplementary Information

*for*

# Detection of gaseous amines with a fluorescent film based on a perylene bisimide-functionalized copolymer

Jinling Zhang,<sup>ab</sup> Ke Liu,<sup>ac</sup> Gang Wang,<sup>ac</sup> Congdi Shang,<sup>ac</sup> Haonan Peng,<sup>ac</sup> Taihong Liu<sup>\*ac</sup> and Yu Fang<sup>\*ac</sup>

<sup>a</sup>Key Laboratory of Applied Surface and Colloid Chemistry (Ministry of Education), <sup>b</sup>School of Materials Science and Engineering,

<sup>c</sup>School of Chemistry and Chemical Engineering, Shaanxi Normal University, Xi'an 710119, People's Republic of China

Corresponding Authors: liuth121@snnu.edu.cn (T. Liu), Tel: +86 29 81530727; yfang@snnu.edu.cn (Y. Fang), Tel: +86 29 81530786, Fax: +86 29 85310097.

## Contents

|                                                                               |    |
|-------------------------------------------------------------------------------|----|
| 1. Materials and methods .....                                                | S1 |
| 2. Synthesis details and characterization of poly(HEMA- <i>co</i> -PBI) ..... | S2 |
| 3. Fluorescence quenching experiments .....                                   | S2 |
| 4. NMR and MS spectra of the monomer and final copolymer .....                | S3 |
| 5. Calculation of the content of PBI units .....                              | S4 |
| 6. Photochemical stability of the fluorescent film .....                      | S4 |
| 7. Determination of detection limit of the film to aniline .....              | S5 |
| 8. References .....                                                           | S6 |

## 1. Materials and methods

HEMA and azodi-isobutyronitrile (AIBN) were purchased from TCI Development Co., Ltd. The perylene derivative, *N*-(tricosan-12-yl)-*N'*-(but-ylacrylate)perylene- 3,4,9,10-tetra-carboxyl-bisimide (monomer M1), was synthesized in a stepwise manner according to the published literatures.<sup>1-3</sup> Toluene was freshly distilled from sodium benzophenone ketyl under a nitrogen atmosphere prior to use. Aniline, *o*-toluidine, *tert*-butylamine, ethylamine, methylamine, hydrazine hydrate, 1,6-hexanediamine, spermidine, cadaverine, and putrescine were purchased from J&K (Shanghai) Chemical Ltd., all other reagents and solvents are of the analytical grade and used directly without further purification. Silica gel plates ( $\Phi \sim 15.0$  mm) used in the experiment for fabrication of fluorescent films were cut from commercial glass-supported TLC plates.

$^1\text{H}$  NMR spectra were recorded on a Bruker AV 600 NMR spectrometer in methanol- $d_4$  using TMS as the internal reference. The molecular weights of the obtained polymers were determined with an Ultimate 3000 DGLC. The UV-vis absorption spectra were measured with a Hitachi U-3900/3900H spectrophotometer and the absorption coefficients of the compounds were calculated based on the Lambert-Beer law. Steady state fluorescence measurements were carried out on a time-correlated single photon counting fluorescence spectrometer (Edinburgh Instruments FLS920) at room temperature with a xenon lamp as the light source.

## 2. Synthesis details and characterization of poly(HEMA-co-PBI)

Monomer M1 (25.0 mg, 0.03 mmol), HEMA (0.50 g, 4.10 mmol) and AIBN (2.0 mg, 0.014 mmol) in 0.2 mL toluene was degassed *via* bubbling of  $\text{N}_2$  gas. After being fully dissolved at room temperature, the mixture was stirred at 70 °C for 12 h and then the crude product was dissolved in methanol, poured into 200 mL diethyl ether and filtered to give poly(HEMA-co-PBI) as a reddish solid (0.41 g, 82%).  $^1\text{H}$  NMR (600 MHz,  $\text{CD}_3\text{OD}$ ): 0.5~1.2 (m,  $-\text{CH}_3$ ), 1.58~2.06 (br,  $-\text{C}-\text{CH}_2-$ ), 3.45~3.90 (s,  $\text{HO}-\text{CH}_2-\text{CH}_2-$ ), 3.90~4.10 (s,  $\text{HO}-\text{CH}_2-\text{CH}_2-$ ).  $\overline{M}_w \sim 4.44 \times 10^6$  (GPC method, PDI=4.44).

## 3. Fluorescence quenching experiments

The fluorescence quenching measurements of the films by amine vapors were monitored following the two similar methods as previously developed in our lab.<sup>4,5</sup> Firstly, basic fluorescence measurements were performed at room temperature on a time-correlated single photon counting fluorescence spectrometer (Edinburgh Instruments FLS 920) with a front face method. The fabricated film was inserted into a quartz cell with its surface facing the excitation light source, and fluorescence emission of the film was recorded in the absence and presence of the analyte vapors.<sup>6</sup> Then the continuous fluorescence intensity of the film was monitored on a home-made sensing platform before and after the injection of amine vapors by an air-tight micro-syringe. The generation of dilute analyst vapor was processed by injecting a certain volume of saturated vapors to a 5.0 mL chamber and stand by for 10 min for equilibrium. For example, 5.0  $\mu\text{L}$  saturated aniline vapor (880 ppm) can be gradually diluted into 5.0 mL vapor (880 ppb).<sup>7,8</sup>

#### 4. NMR and MS spectra of the monomer and final copolymer

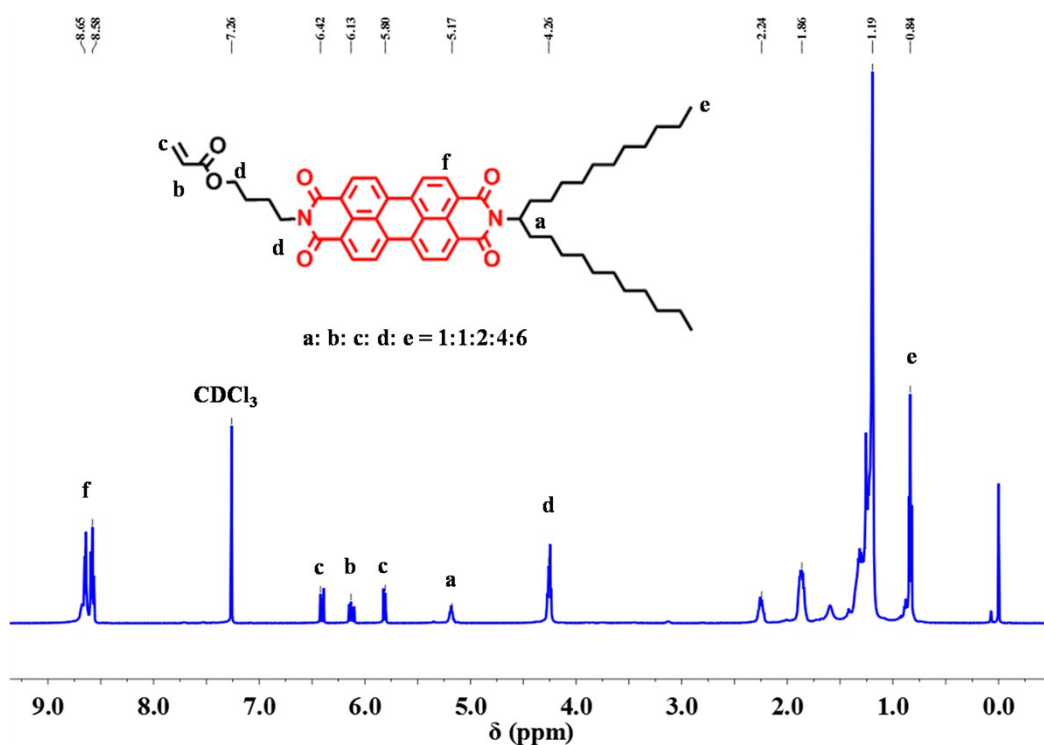

Fig. S1. <sup>1</sup>H NMR spectrum of monomer M1 in CDCl<sub>3</sub>.

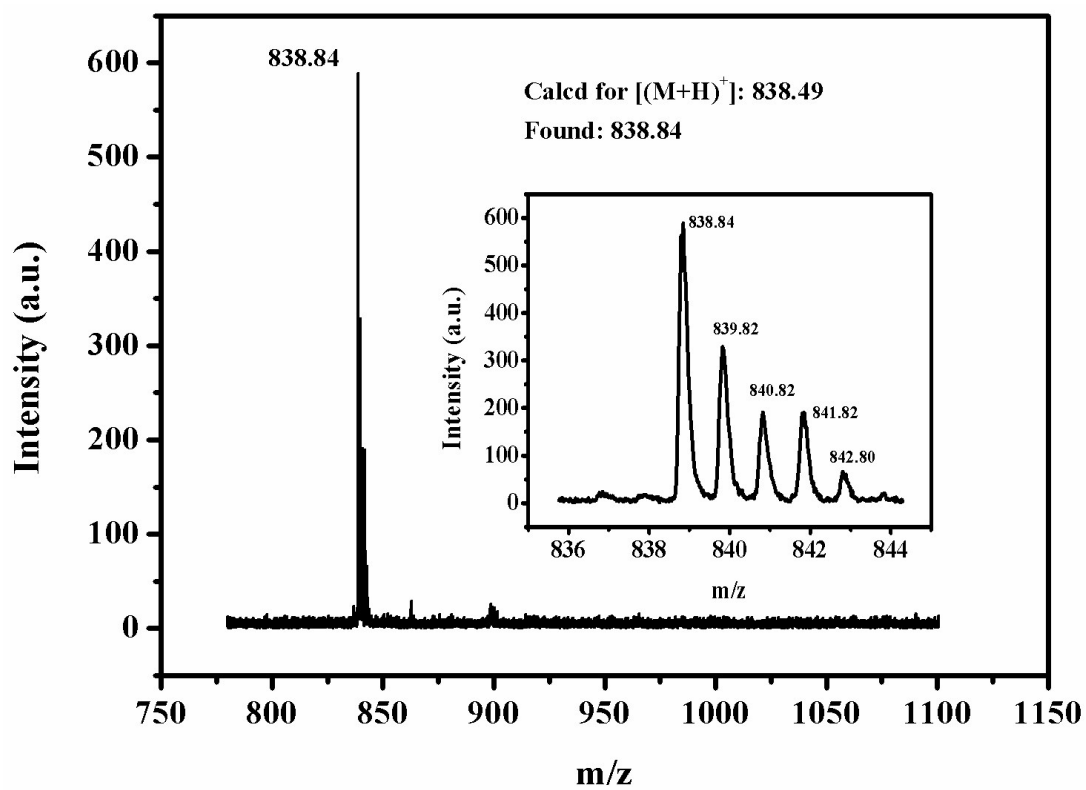

Fig. S2. MALDI-TOF spectrum of monomer M1.

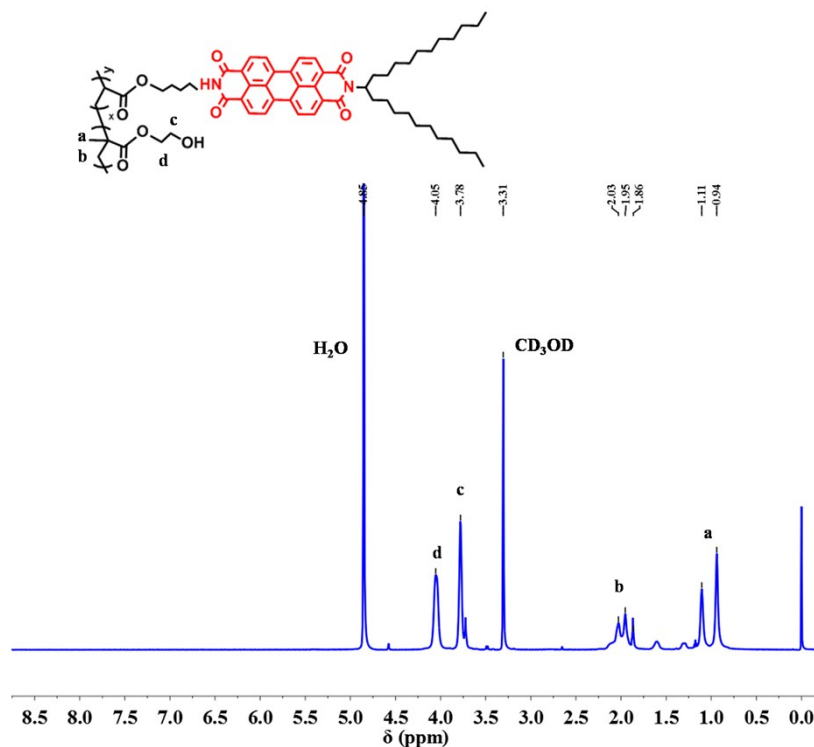

Fig. S3.  $^1\text{H}$  NMR spectrum of poly(HEMA-*co*-PBI) in  $\text{CD}_3\text{OD}$ .

## 5. Calculation of the content of PBI units

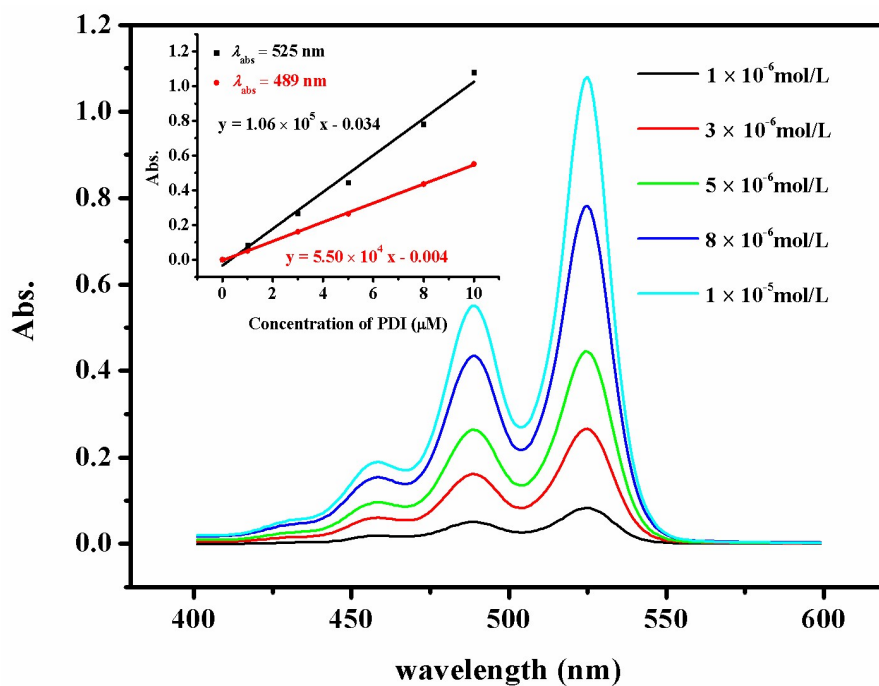

Fig. S4. The standard working curve for absorption of M1 in MeOH.

## 6. Photochemical stability of the fluorescent film

The photochemical stability of the film as produced was tested by continuously monitoring its

fluorescence emission at the maximum excitation and emission wavelengths ( $\lambda_{\text{ex}}/\lambda_{\text{em}} = 490/540$  nm) for about 2 h. It is seen that the emission intensity of the film is stable and the emission didn't show any decrease over 2 h continuous illumination, suggesting the superior photo-chemical stability of the film. Fig. S5 depicts a typical result from the tests.

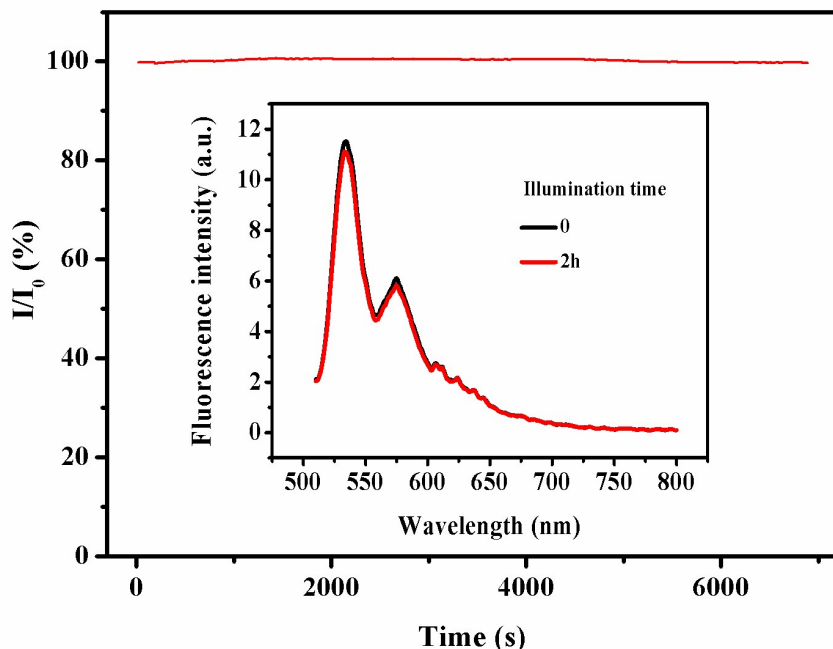

**Fig. S5** Variation of fluorescence emission intensities of polymer in film state recorded at the wavelength of 540 nm ( $\lambda_{\text{ex}} = 490$  nm, 150 W, Xe Lamp).

## 7. Determination of detection limit of the film to aniline

The detection limit ( $DL$ ) of the sensing film has been determined according to the following equations:

$$S_b = \sqrt{\frac{\sum_{i=1}^n X_i - \bar{X}}{n-1}} \quad (1)$$

$$S = \frac{\Delta I}{\Delta C} \quad (2)$$

$$DL = \frac{3S_b}{S} \quad (3)$$

The standard deviation ( $S_b$ ) was calculated as follow: Firstly, the response intensity of the film in air was recorded ( $x_i$ ) for more than 10 times and the corresponding average intensity ( $\bar{x}$ ) was calculated. By fitting the intensity data and the average intensity as obtained into eq. 1, the value of the standard deviation ( $S_b$ ) was acquired. Then, the film was exposed in aniline vapor of different concentrations, and the response intensity (Fig. 3b) was recorded. Corresponding variations of the

intensity ( $\Delta I$ ) and vapor concentration ( $\Delta c$ ) data were fitted into eq. 2, then  $S$  value for the present system was obtained. Finally, the  $DL$  for the present system was calculated according to eq. 3.

## 8. References

- [1] C. Lu, M. Fujitsuka, A. Sugimoto and T. Majima, Unprecedented intramolecular electron transfer from excited perylenediimide radical anion, *J. Phys. Chem. C*, 2016, **120**, 12734-12741.
- [2] N. J. L. K. Davis, R. W. MacQueen, D. A. Roberts, A. Danos, S. Dehn, S. Perriere and T. W. Schmidt, Energy transfer in pendant perylene diimide copolymers, *J. Mater. Chem. C*, 2016, **4**, 8270-8275.
- [3] Z. Yuan, Y. Xiao, Y. Yang and T. Xiong, Soluble ladder conjugated polymer composed of perylenediimides and thieno[3,2-*b*]thiophene (LCPT): A highly efficient synthesis via photocyclization with the sunlight, *Macromolecules*, 2011, **44**, 1788-1791.
- [4] C. Shang, G. Wang, M. He, X. Chang, J. Fan, K. Liu, H. Peng and Y. Fang, A high performance fluorescent arylamine sensor toward lung cancer sniffing, *Sens. Actuators, B*, 2017, **241**, 1316-1323.
- [5] H. Peng, L. Ding, T. Liu, X. Chen, L. Li, S. Yin and Y. Fang, An ultrasensitive fluorescent sensing nanofilm for organic amines based on cholesterol-modified perylene bisimide, *Chem. Asian J.*, 2012, **7**, 1576-1582.
- [6] T. Liu, G. He, M. Yang and Y. Fang, Monomolecular-layer assembly of oligothiophene on glass wafer surface and its fluorescence sensitization by formaldehyde vapor, *J. Photochem. Photobio. A: Chem.*, 2009, **202**, 178-184.
- [7] Y. Che, X. Yang, S. Loser and L. Zang, Expedient vapor probing of organic amines using fluorescent nanofibers fabricated from an *n*-type organic semiconductor, *Nano Lett.*, 2008, **8**, 2219-2223.
- [8] Z. Jiao, Y. Zhang, W. Xu, X. Zhang, H. Jiang, P. Wu, Y. Fu, Q. He, H. Cao and J. Cheng, Highly efficient multiple-anchored fluorescent probe for the detection of aniline vapor based on synergistic effect: Chemical reaction and PET, *ACS Sens.*, 2017, **2**, 687-694.
